# Supplementary material
Source: publisher figshare collection journal article supplement (https://acs.figshare.com/ndownloader/files/7650727)
Supplement: Supplementary file 1 [file 7650727]

# **Multiplexed phosphoproteomic profiling using titanium dioxide and immuno-affinity enrichments reveals complementary phosphorylation events**

**Anthony P Possemato<sup>1‡</sup>, Joao A Paulo<sup>2‡</sup>, Daniel Mulhern<sup>1</sup>, Ailan Guo<sup>1</sup>, Steven P Gygi<sup>2</sup>, and Sean A Beausoleil<sup>1¶</sup>**

<sup>1</sup> Bluefin Biomedicine, Beverly, MA 01915, United States

<sup>2</sup> Department of Cell Biology, Harvard Medical School, Boston, MA 02115, United States

<sup>‡</sup> These authors contributed to this work equally

<sup>¶</sup> To whom correspondence should be addressed: [sbeausoleil@bluefinbiomed.com](mailto:sbeausoleil@bluefinbiomed.com)

## **Table of contents**

|                              |              |
|------------------------------|--------------|
| <b>Supplemental Figure 1</b> | <b>S-2</b>   |
| <b>Supplemental Figure 2</b> | <b>S-3</b>   |
| <b>Supplemental Figure3</b>  | <b>S-4,5</b> |

**Supplemental Figure 1**

**A)**

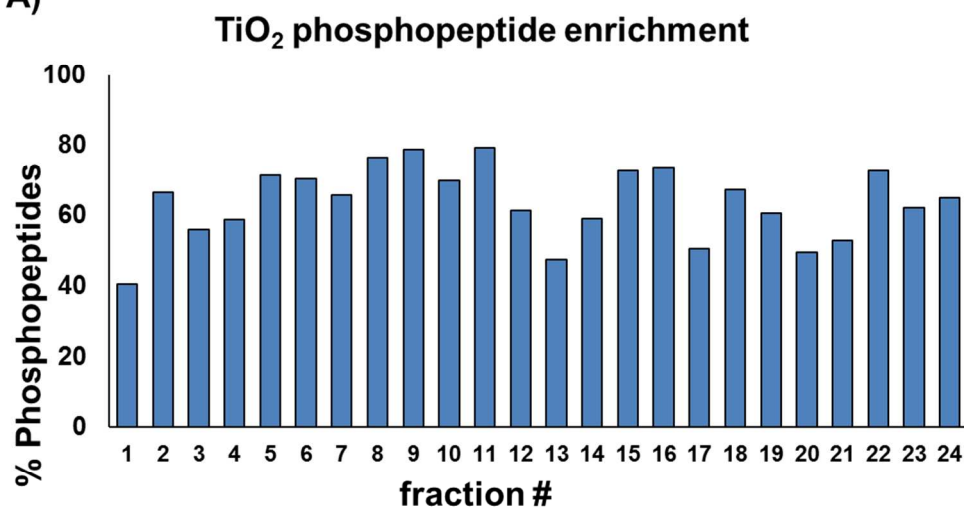

**B)**

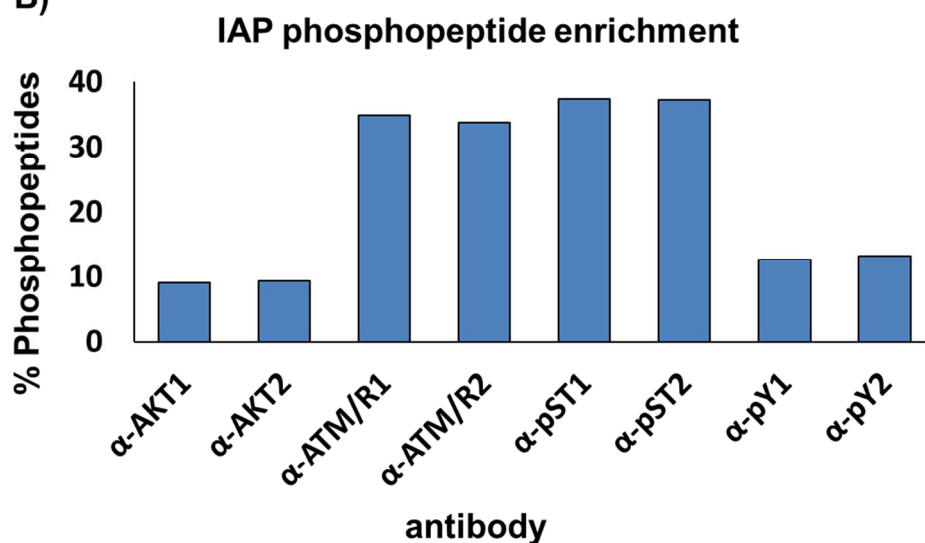

**Supplemental Figure 1: Analysis of phosphopeptide enrichment.** A) Phosphopeptide enrichment for each of the 24 fractions using the TiO<sub>2</sub> method. B) Phosphopeptide enrichment for each IAP (replicate 1 and 2).

## Supplemental Figure 2

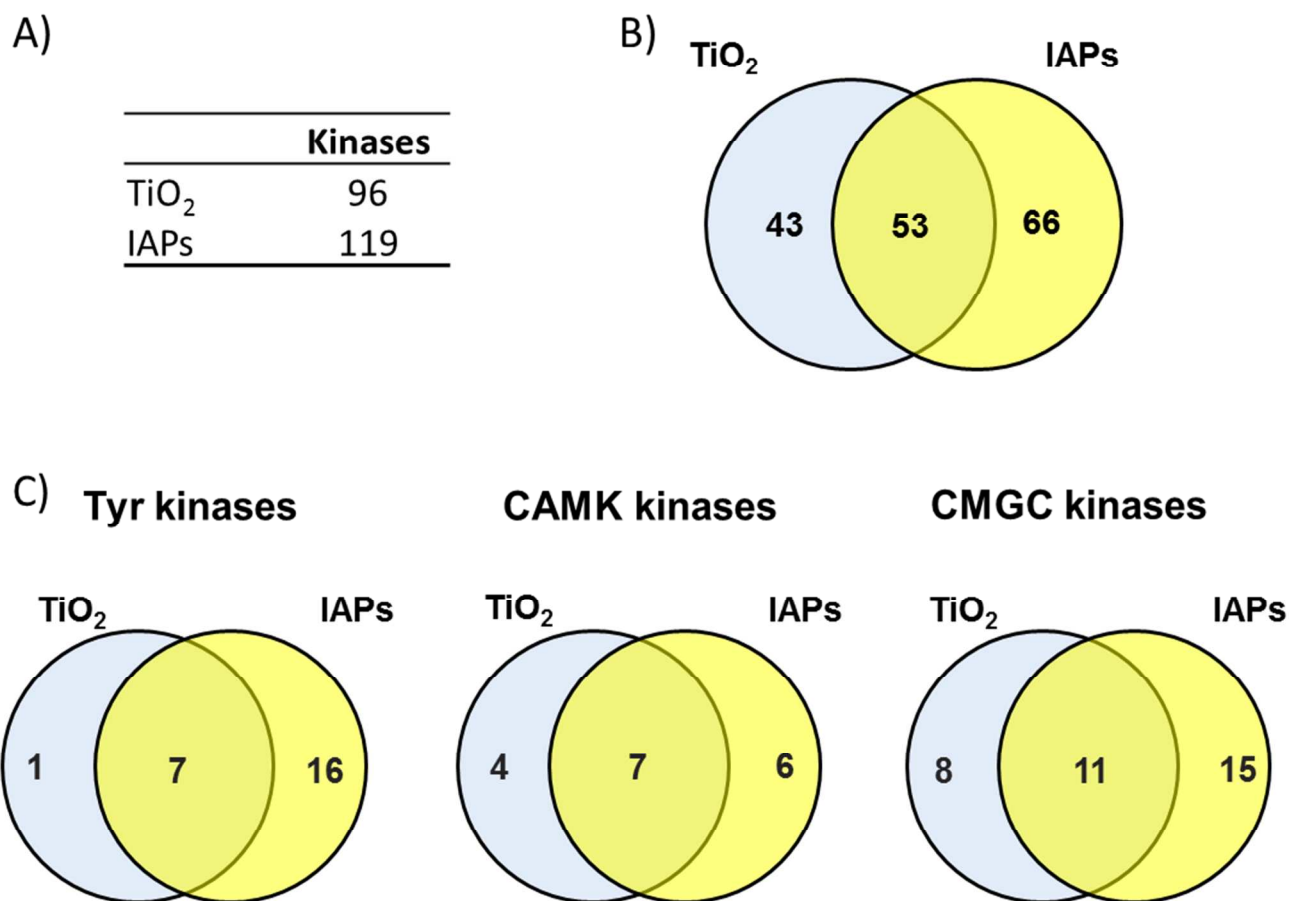

**Supplemental Figure 2: Kinases identified by TiO<sub>2</sub> and IAP enrichments** **A)** Tally of kinases identified with each enrichment strategy. **B)** Venn diagram of corresponding overlap. **C)** Venn diagrams for Tyrosine, CAMK and CMGC kinases for each enrichment strategy.

## Supplemental Figure 3

### A) BEZ-235

TiO<sub>2</sub> pS

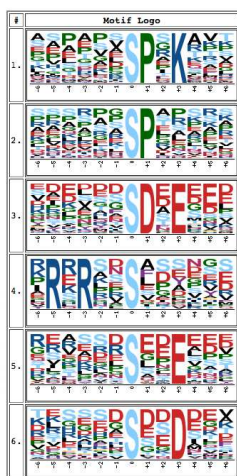

TiO<sub>2</sub> pT

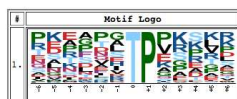

IAP pS

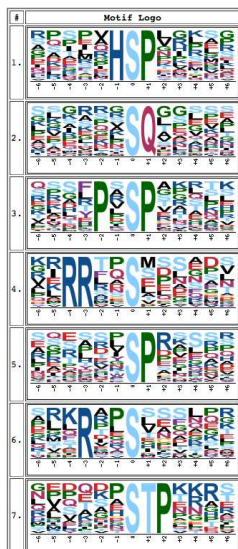

IAP pT

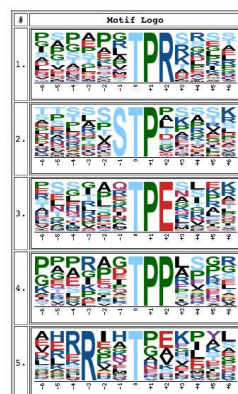

### B) GSK1120212

TiO<sub>2</sub> pS

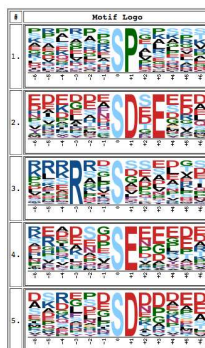

TiO<sub>2</sub> pT

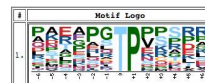

IAP pS

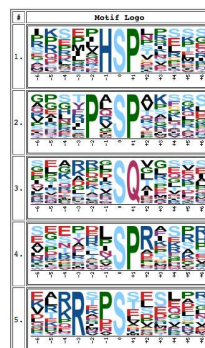

IAP pT

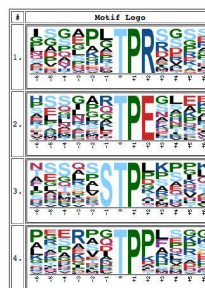

### C) Staurosporine

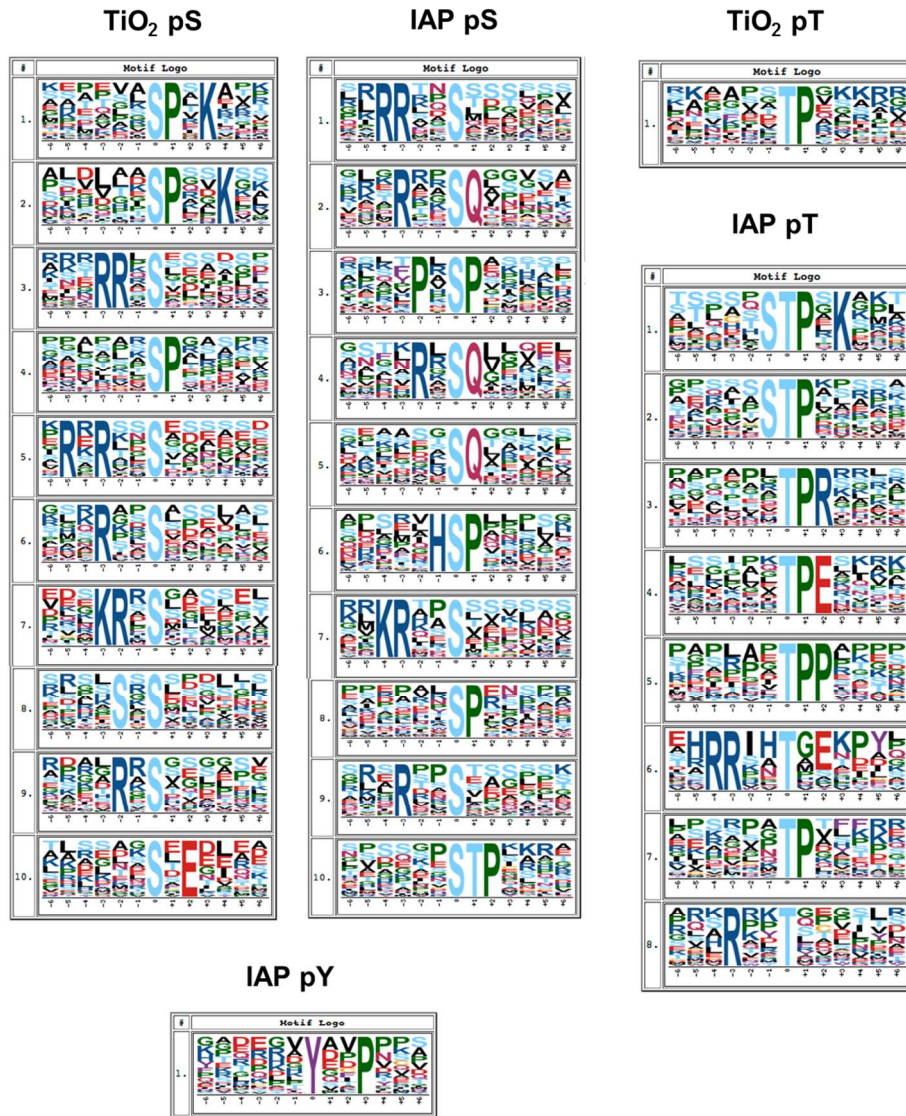

**Supplemental Figure 3: Sequence logos for phosphorylation sites.** PhosphoSitePlus (<http://www.phosphosite.org>) motif analysis (38) of quantified phosphorylation events inhibited following treatment with A) BEZ-235, B) GSK 1120212, and C) Staurosporine. Sequences were centered at the phosphorylated residue and extended six amino acids on each side, thereby resulting in a 13-amino acid long motif for each phosphorylation site.
